# Supplementary material for: From Childhood to Old Age: Current Knowledge and Practical Approaches to Metabolic Dysfunction-Associated Steatotic Liver Disease
Source: MDPI journal article supplement (doi:10.3390/jcm15041536), 2026-02-15
Supplement: s1 [file jcm-4129696-supplementary.pdf › jcm-4129696-supplementary.pdf]

**Table S1. Drug-Induced Liver Injury—mechanisms and types.**

| Drug                                | Key Mechanism                                                                                        | Liver Injury Pattern                                |
|-------------------------------------|------------------------------------------------------------------------------------------------------|-----------------------------------------------------|
| Acetaminophen                       | Induces dose-dependent oxidative stress and hepatocellular injury                                    | Steatohepatitis / acute liver failure risk          |
| Amiodarone                          | Induces mitochondrial dysfunction, resulting in phospholipid buildup and increased oxidative stress. | Steatohepatitis, fibrosis                           |
| Antiretroviral agents               | Inhibit mitochondrial DNA polymerase gamma                                                           | Steatosis due to mitochondrial dysfunctions         |
| Corticosteroids                     | Induce insulin resistance and promote hepatic triglyceride accumulation                              | Macrovesicular steatosis                            |
| Estrogen/Hormonal Agent             | Modifies hepatic lipid metabolism, leading to intracellular fat deposition                           | Steatosis, potential progression to steatohepatitis |
| Methotrexate                        | Causes oxidative stress and mitochondrial dysfunction, resulting in altered lipid metabolism         | Steatosis, potential progression to fibrosis        |
| Nonsteroidal antiinflammatory drugs | Triggers oxidative stress with potential mitochondrial damage                                        | Steatosis, variable severity                        |
| Tamoxifen                           | Modulates estrogen receptor signaling and disrupts lipid metabolism                                  | Steatosis with possible steatohepatitis             |
| Tetracyclines                       | Leads to impaired mitochondrial function with inhibition of fatty acid oxidation                     | Microvesicular steatosis                            |
| Valproic acid                       | Disrupts mitochondrial beta-oxidation, resulting in lipid accumulation                               | Microvesicular steatosis                            |
